# Supplementary material
Source: PubMed Central journal article supplement (PMC2765568)
Supplement: NIHMS150561-supplement-supplemental.pdf [file NIHMS150561-supplement-supplemental.pdf]

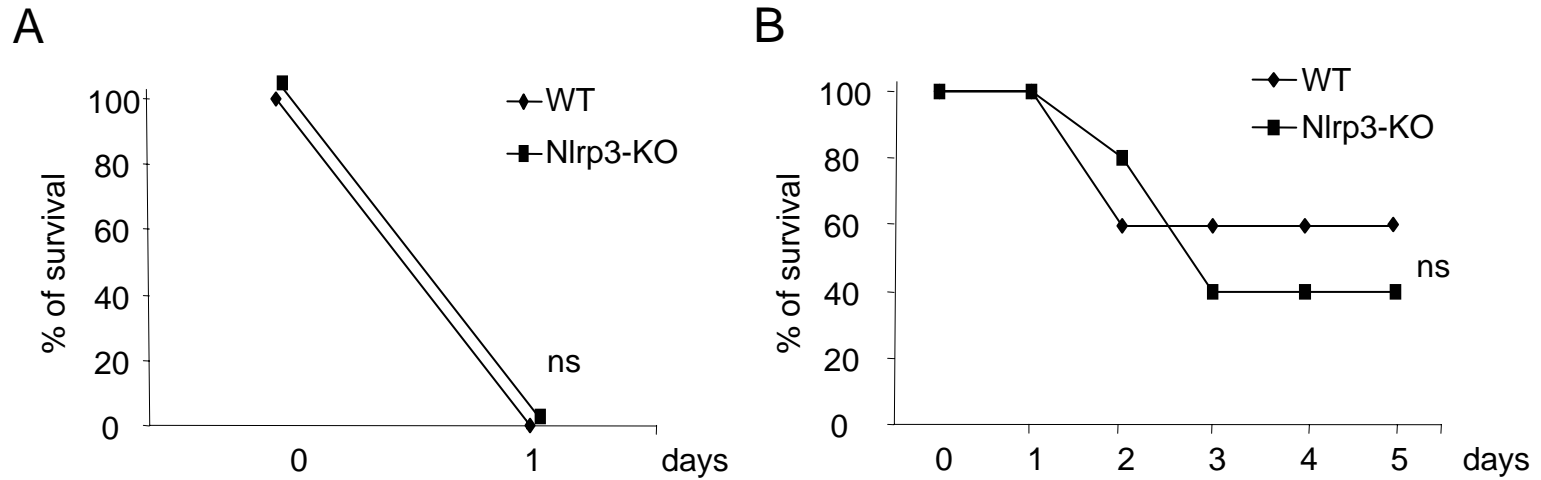

**Supplemental Figure 1.** WT or Nlrp3-KO mice were infected intraperitoneally with  $10^4$  (A) or  $10^2$  (B) bacteria and animals were monitored for survival over time. Results are representative of three separate experiments with 5 mice (A) or two separate experiments with 10 mice (B) per group. ns, not significant.
